1 **Detection of *Ramularia collo-cygni* from barley (*Hordeum vulgare*)**  
2 **in Australia using triplex quantitative and digital PCR**

3  
4 **N. L. Knight<sup>a</sup>, A. Moslemi<sup>a</sup>, F. Begum<sup>a</sup>, K. N. Dodhia<sup>a</sup>, L. Covarelli<sup>a,b</sup>, A. L. Hills<sup>c</sup>, F. J. Lopez-**  
5 **Ruiz<sup>a\*</sup>**

6 <sup>a</sup>Centre for Crop and Disease Management, School of Molecular and Life Sciences, Curtin  
7 University, Bentley, Western Australia 6102, Australia

8 <sup>b</sup>Department of Agricultural, Food and Environmental Sciences, University of Perugia, Perugia  
9 06121, Italy

10 <sup>c</sup>Department of Primary Industries and Regional Development, Esperance, Western Australia  
11 6450, Australia

12 \*Corresponding author, E-mail: [fran.lopezruiz@curtin.edu.au](mailto:fran.lopezruiz@curtin.edu.au)

13 **Abstract**

14 Ramularia leaf spot (RLS), caused by *Ramularia collo-cygni*, is an emerging threat to barley  
15 (*Hordeum vulgare*) production. RLS has been reported in Australia; however only minimal  
16 information is available regarding its detection and distribution. Due to initial asymptomatic  
17 growth *in planta*, slow growth *in vitro* and symptomatic similarities to net blotch and physiological  
18 leaf spots, detection of this pathogen can be challenging. Quantitative PCR-based methods for *R.*  
19 *collo-cygni*-specific identification and detection have been described, however these assays (based  
20 upon the internal transcribed spacer [ITS] region) have been demonstrated to lack specificity.  
21 False-positive detections may have serious implications, thus we aimed to design a robust *R. collo-*  
22 *cygni*-specific PCR method. Using the phylogenetically informative RNA polymerase II second  
23 largest subunit (*rpb2*) and translation elongation factor 1- $\alpha$  (*tef1- $\alpha$* ) genes, along with the *tef1- $\alpha$*   
24 gene of *H. vulgare*, a triplex assay was developed for both quantitative and digital PCR. The triplex  
25 assay was used to assess DNA of barley leaves from New South Wales, South Australia, Tasmania,  
26 Victoria and Western Australia, along with DNA of seeds from Western Australia. Detection of  
27 *R. collo-cygni* DNA was confirmed for leaf samples from New South Wales, South Australia,  
28 Tasmania, Victoria and Western Australia, indicating a distribution ranging across the southern  
29 barley growing regions of Australia. No *R. collo-cygni* DNA was detected in seed from Western  
30 Australia. The *R. collo-cygni*-specific assay will be a valuable tool to assist with monitoring the  
31 distribution of *R. collo-cygni* in Australia and other regions.

32

33 **Keywords:** *Ramularia collo-cygni*, Ramularia leaf spot, triplex, qPCR, dPCR

34

## 35 **Introduction**

36 *Ramularia collo-cygni* infection of barley (*Hordeum vulgare*) has gained increasing attention over  
37 the past 30 years (Dussart et al. 2020; Havis et al. 2015b). The resulting disease, Ramularia leaf  
38 spot (RLS), has been reported in many barley growing regions of the world including Chile,  
39 Colombia, Europe, Mexico, New Zealand, South Africa and the United States (Beukes et al. 2016;  
40 Dussart et al. 2020; Havis and Brown 2019; Spencer et al. 2019; Walters et al. 2008). The first  
41 detections of *R. collo-cygni* in Australia were reported between 2010 and 2018 in New South  
42 Wales, Tasmania and Western Australia (Biosecurity Tasmania 2020; GRDC 2021; Oxley et al.  
43 2010; Spencer et al. 2019); however, limited information regarding these detections is available.

44 *R. collo-cygni* typically grows asymptotically during the early growing season, with RLS  
45 symptoms appearing late in the season, typically around anthesis and after head emergence  
46 (Kaczmarek et al. 2017; Walters et al. 2008). RLS is characterised by small necrotic lesions,  
47 usually with a chlorotic halo (Havis et al. 2015a; Sutton and Waller 1988). As the disease  
48 progresses these lesions coalesce, leading to large areas of the leaf being affected (Walters et al.  
49 2008). Environmental conditions, including light intensity, leaf surface wetness, temperature and  
50 water availability, may affect RLS development (Havis et al. 2015b; Hoheneder et al. 2021b;  
51 Makepeace et al. 2008; McGrann and Brown 2018). Yield losses of up to 70% have been reported  
52 but are more commonly between 5 to 25%, with reductions in grain size and quality (Harvey 2002;  
53 Havis et al. 2015b; Pereyra et al. 2014; Pinnschmidt and Jørgensen 2009; Greif 2002 as cited in  
54 Sghyer and Hess 2019).

55 Seed-borne *R. collo-cygni* has been described as the main source of inoculum and as the primary  
56 mechanism for spread of the pathogen (Harvey 2002; Havis et al. 2014; Matusinsky et al. 2011).  
57 Alternative hosts, such as wheat and perennial grasses (Kaczmarek et al. 2017), and colonised

58 plant debris may also play a role in harbouring inoculum. Dussart et al. (2020) provide a thorough  
59 review of the current understanding of *R. collo-cygni* epidemiology. RLS can be managed using  
60 *R. collo-cygni* free seeds, fungicides, resistant varieties, crop rotation and stubble reduction  
61 (Dussart et al. 2020; Hoheneder et al. 2021a; Oxley et al. 2010). However, the emergence of  
62 resistance to quinone-outside inhibitors (QoI) (Fountaine and Fraaije 2009; Matusinsky et al. 2010)  
63 and reduced sensitivity to succinate dehydrogenase inhibitors (SDHI) and demethylation inhibitors  
64 (DMI) (FRAC 2015; Rehfus et al. 2019) has intensified the need for varietal resistance and  
65 alternative control measures.

66 Effective management of RLS relies on early and accurate detection of the pathogen. Detection,  
67 however, can be challenging due to asymptomatic growth *in planta* (Havis et al. 2014; Kaczmarek  
68 et al. 2017), a lack of visible symptoms on seed (Oxley et al. 2010) and slow growth in culture  
69 (Walters et al. 2008). Visual identification is also problematic as RLS symptoms may appear  
70 similar to symptoms caused by *Pyrenophora teres* f. *maculata* (spot form net blotch), *P. teres* f.  
71 *teres* (net form net blotch) (Sachs et al. 1998 as cited in Walters et al. 2008) or physiological leaf  
72 spotting (Wu and Tiedemann 2002). DNA detection can be a reliable method for identifying the  
73 presence of pathogens, and several *R. collo-cygni*-specific PCR assays, based on sequences of the  
74 internal transcribed spacer (ITS) region (Frei et al. 2007; Havis et al. 2006; Matusinsky et al. 2011;  
75 Taylor et al. 2010), have been reported. These assays have been used to detect and quantify *R.*  
76 *collo-cygni* DNA in host tissue, including leaves and seeds (Havis et al. 2014).

77 PCR detection of a specific pathogen is reliant upon unique DNA sequences being associated  
78 with the pathogen of interest. However, as sequences of a greater number of fungal species,  
79 including *Ramularia* species (Videira et al. 2016), become available, the specificity of PCR assays  
80 requires confirmation. This should include critical assessment across different environments with

81 potentially undescribed microflora. The specificity of *R. collo-cygni* PCR assays has been  
82 investigated using a range of plant pathogen DNA templates and genetic databases (Frei et al.  
83 2007; Havis et al. 2006; Matusinsky et al. 2011; Taylor et al. 2010), however the utilisation of  
84 sensitive techniques such as quantitative PCR (qPCR) may increase the risk of false negative  
85 detection in the presence of similar sequences. Indeed, weak amplification of *R. indica* and *R.*  
86 *vallisumbrosae* was reported by Taylor et al (2010) using a qPCR assay. Confidence in detection,  
87 especially in new geographic regions, requires reassessment of previously described assays in light  
88 of new sequence data, along with development of alternative species-specific assays.

89 A range of methods for PCR detection of target DNA are available, including conventional PCR,  
90 real-time qPCR and digital PCR (dPCR). Quantitative PCR provides sensitive detection of low  
91 quantities of target DNA (approximately 1 pg *R. collo-cygni* DNA; Taylor et al. 2010) and is  
92 effective for plant pathogen detection (Schaad and Frederick 2002). Digital PCR is an emerging  
93 technology which uses assay design similar to qPCR and provides similarly sensitive detection of  
94 target DNA (Jones et al. 2016). The key difference is the need for a standard curve to quantify  
95 target DNA in qPCR, while dPCR relies on Poisson Distribution Analysis to assess end-point PCR  
96 fluorescence across partitioned droplets of reaction mixture (The dMIQE Group and Huggett  
97 2020). Both qPCR and dPCR allow for simultaneous detection of multiple DNA targets (Klein  
98 2002; Zhong et al. 2011). Such multiplexing can allow detection of pathogen and host DNA within  
99 the same sample, confirming DNA template quality when pathogen DNA is absent. This can be  
100 especially valuable when evaluating seed samples which may contain PCR inhibitors (Knight et  
101 al. 2020).

102 The spread of *R. collo-cygni* into new regions, such as Australia, has important management  
103 implications, especially considering the unknown nature of cultivar resistance or fungicide

104 sensitivity. The first aim of this study was to provide improved confidence in *R. collo-cygni*  
105 identification and detection by developing alternative species-specific assays which can be adapted  
106 for use in both qPCR and dPCR platforms. The second aim was to assess leaf and seed samples  
107 from Australia for the presence of *R. collo-cygni* DNA.

108

## 109 **Materials and Methods**

### 110 **DNA for assessing PCR specificity**

111 DNA of *R. collo-cygni* (isolate Rcc\_Pg\_1), *R. endophylla* (isolate CBS 113265) and *R. pusilla*  
112 (isolate CBS 124973) was provided by the University of Perugia, Italy. DNA was extracted from  
113 mycelia harvested from 4-week-old cultures grown on potato dextrose agar (PDA) using the CTAB  
114 extraction method described by Covarelli et al. (2015). Rcc\_Pg\_1 was identified as *R. collo-cygni*  
115 based on morphology and partial sequence of the internal transcribed spacer (ITS) region amplified  
116 using RC3 and RC5 primers designed by Frei et al. (2007). *R. endophylla* (isolate CBS 113265)  
117 and *R. pusilla* (isolate CBS 124973) were obtained from the collection at the Westerdijk Fungal  
118 Biodiversity Institute. Dry DNA was sent to the Centre for Crop and Disease Management, Curtin  
119 University and re-suspended in 1% TE buffer (15.76 g Tris-Cl, 2.92 g EDTA, 1 L distilled water)  
120 and stored at -80 °C.

121 DNA of plant pathogenic fungi collected from Western Australian cereal growing regions was  
122 extracted for species-specificity assessment of the Ram6, *Rcc\_139\_rpb2*, *Rcc\_88\_tef1-α* and  
123 *Hv\_116\_tef1-α* PCR assays. These fungi included one single-spored isolate each of *Alternaria*  
124 *alternata*, *Ascochyta lentis*, *Blumeria graminis* f. sp. *hordei*, *Blumeria graminis* f. sp. *tritici*,  
125 *Botrytis cinerea*, *Curvularia trifolii*, *Diaporthe toxica*, *Parastagonospora nodorum*, *Pleiochaeta*

126 *setosa*, *P. teres* f. *maculata* (isolate SG1; Mair et al. 2020), *P. teres* f. *teres* (isolate K0103; Mair  
127 et al. 2020), *Rhizoctonia* sp., *Septoria tritici* and *Stemphylium solani* provided by the Department  
128 of Primary Industries and Regional Development (DPIRD) and Centre for Crop and Disease  
129 Management, Curtin University. *B. graminis* f. sp. *hordei* and *B. graminis* f. sp. *tritici* were grown  
130 on detached barley and wheat leaves, respectively. Briefly, leaves of seven-day-old barley (cv.  
131 Baudin) and wheat (cv. Trojan) seedlings were detached from plants grown at room temperature  
132 with a 12-h photoperiod and placed into benzimidazole amended agar (10 g L<sup>-1</sup> agar + 50 mg L<sup>-1</sup>  
133 benzimidazole). Leaves were inoculated with spores and incubated under a 16-h photoperiod at 21  
134 and 15 °C (light and dark, respectively) for seven days. The remaining isolates were grown on V8-  
135 PDA (Mair et al. 2016) and mycelia was harvested from seven-day-old cultures. Leaves or mycelia  
136 were frozen in liquid nitrogen and ground with two 9 mm diameter steel balls at 30 frequency for  
137 60 s (MM400, Retsch). DNA was extracted using a BioSprint 15 DNA Plant Kit according to the  
138 manufacturer's instructions (Qiagen, Australia) and stored at -20 °C. Pure barley DNA was  
139 extracted from leaves of seven-day-old barley seedlings (cv. Baudin) grown at room temperature  
140 with a 12-h photoperiod using the Biosprint method as described above. DNA concentrations were  
141 measured with a Qubit Flex Fluorometer (Thermo Fisher Scientific) using a Qubit dsDNA BR  
142 assay kit (Thermo Fisher Scientific) and adjusted to 2 ng μL<sup>-1</sup>.

143

#### 144 **Specificity of published *R. collo-cygni* quantitative PCR assays**

145 Specificity of the *R. collo-cygni* detection assay Ram6 described by Taylor et al. (2010) was  
146 investigated using a BLAST search of the GenBank nucleic acid database, aligning primer, probe  
147 and amplicon sequences against sequences of the *Ramularia* genus (taxid:112497) and by qPCR

148 assessment of the fungal isolates described above. A similar alignment assessment was performed  
149 for the assay described by Matusinsky et al. (2011), but no PCR was included.

150 Quantitative PCR using the Ram6 assay was conducted following methods modified from Taylor  
151 et al. (2010). Reactions were performed in a CFX96 or CFX384 real-time system (Bio-Rad). Each  
152 20  $\mu$ L reaction consisted of 10  $\mu$ L of SensiFAST Probe No-ROX Mix (2 $\times$ ) (Bioline), 0.25  $\mu$ M  
153 each of RamF6 and RamR6 primers (Sigma, Australia), 0.15  $\mu$ M of molecular beacon Ram6  
154 (Sigma, Australia) and 5  $\mu$ L of template DNA. Thermal cycling conditions consisted of 5 min at  
155 95  $^{\circ}$ C, followed by 40 cycles of 95  $^{\circ}$ C for 10 s and 55  $^{\circ}$ C for 40 s. Fluorescence emission was  
156 recorded at the 55  $^{\circ}$ C step of each cycle. Each sample template was assessed in duplicate. DNA of  
157 *R. collo-cygni* (isolate Rcc\_Pg\_1) was included as a positive control, DNA of barley (cv. Baudin)  
158 was included as a negative control and nuclease free water was included as a no template control  
159 (NTC). Mixtures of *R. collo-cygni* and barley DNA were also assessed. Six ten-fold serial dilutions  
160 of *R. collo-cygni* DNA (ranging from 10 ng to 0.01 pg) were included for sensitivity analysis. A  
161 standard curve was generated using the CFX Maestro Software v. 1.1 (Bio-Rad) by plotting the  
162 logarithm of *R. collo-cygni* DNA concentrations against the quantification cycle (Cq). The  
163 coefficient of determination ( $R^2$ ), slope, y-intercept and reaction efficiency (E) were reported by  
164 the software for each standard curve.

165

## 166 **Development of species-specific PCR assays**

167 Two *R. collo-cygni* specific assays (Table 1) were developed from sequences of the  
168 phylogenetically informative genes RNA polymerase II second largest subunit (*rpb2*) and  
169 translation elongation factor 1-alpha (*tef1- $\alpha$* ) (Videira et al. 2016). Sequences of *rpb2* and *tef1- $\alpha$*   
170 from seven *R. collo-cygni* isolates and 181 isolates of other *Ramularia* species and related genera



171 (Supp. Table S1; Videira et al. 2016), were imported from the National Center for Biotechnology  
172 Information (NCBI) GenBank database into Geneious v. 6.1.8 (<https://www.geneious.com>) and  
173 aligned using Geneious Alignment with default settings. DNA sequences unique to *R. collo-cygni*  
174 were manually identified and primers and probes were designed against these unique sequences  
175 and assessed using Primer3 v. 0.4.0 (Koressaar and Remm 2007; Untergasser et al. 2012) and PCR  
176 Primer Stats analysis in Sequence Manipulation Suite v. 2 (Stothard 2000). Primers were designed  
177 to include discriminatory polymorphic regions at the 3' terminus (Petruska et al. 1988) and  
178 encompass unique sequences to which probes were aligned. Primer and probe sequences (Table 1)  
179 were assessed for specificity using a Basic Local Alignment Search Tool (BLAST) search of the  
180 Standard databases: Nucleotide Collection (nr/nt) in GenBank. Differences in the expect value  
181 (Lobo 2008) between *R. collo-cygni* and the next closest species hit in the BLAST search were  
182 used for assessing the likely specificity of the primer and probe sequences.

183 A *H. vulgare* specific assay (Table 1) was developed from sequences of the *tefl-α* gene. This  
184 assay acted as an internal positive control during PCR assessment of plant DNA templates. The  
185 design process for *H. vulgare* specific primers and probe was similar to that described above for  
186 the *R. collo-cygni* assays. Briefly, four *tefl-α* sequences of *H. vulgare* (Supp. Table S2) were  
187 identified in the NCBI sequence database and aligned in Geneious. Primers and probe were  
188 designed against the conserved regions and assessed for specificity by a BLAST search of the  
189 GenBank nucleic acid database.

190

### 191 **Quantitative PCR assessment of alternative *R. collo-cygni* specific assays**

192 Uniplex qPCR reactions were assessed for assays *Rcc\_139\_rpb2*, *Rcc\_88\_tefl-α* and  
193 *Hv\_116\_tefl-α* (Table 1). Each 20 μL reaction consisted of 10 μL of SensiFAST Probe No-ROX

194 Mix (2×) (Bioline, Australia), 0.25 µM of each forward and reverse primer (Integrated DNA  
195 Technologies, USA), 0.15 µM of probe and 5 µL of template DNA. Thermal cycling conditions  
196 were as described above, except for annealing temperatures of 66 °C for *Rcc\_139\_rpb2*, 64 °C for  
197 *Rcc\_88\_tef1-α* and 64 or 66 °C for *Hv\_116\_tef1-α*.

198 Simultaneous detection of multiple DNA targets was also assessed. In duplex qPCR, the  
199 *Hv\_116\_tef1-α* assay was combined with either *Rcc\_139\_rpb2* or *Rcc\_88\_tef1-α* assays. For  
200 triplex qPCR, all three assays were combined. Each 20 µL reaction was as described above, with  
201 the same individual primer and probe concentrations for duplex and triplex assays. Cycling  
202 conditions were as described above, with the annealing temperature adjusted to 64 °C for duplex  
203 and 60 °C for triplex assays. The DNA controls and standards described above were assessed in  
204 duplicate with each uniplex, duplex and triplex assay. The serial dilutions of *R. collo-cygni* DNA  
205 were also assessed in triplicate for the triplex assay and a trend line was fitted in Microsoft Excel  
206 2016. The collection of DNA of fungal isolates was assessed with the duplex and triplex assays.  
207 For the triplex assay, intra- and inter-assay variation were reported as the mean DNA quantity and  
208 coefficient of variation of replicate samples of a mixed *R. collo-cygni* and *H. vulgare* DNA  
209 template.

210

### 211 **Droplet digital PCR assessment of alternative *R. collo-cygni* specific assays**

212 The *Rcc\_88\_tef1-α*, *Rcc\_139\_rpb2* and *Hv\_116\_tef1-α* assays were further assessed in droplet  
213 digital PCR (ddPCR) in uniplex, duplex and triplex as described above. Droplet digital PCR was  
214 performed on a QX200 system (Bio-Rad), following the manufacturer's instructions. Briefly, each  
215 22 µL reaction consisted of 11 µL of 2× Bio-Rad ddPCR Supermix for Probes (no dUTP), 0.25  
216 µM of each forward and reverse primer, 0.15 µM of probe and 5 µL of template DNA. Primer and

217 probe concentrations were the same for uniplex and duplex assessment. Triplex assessment utilised  
218 amplitude-based multiplexing, with the *Hv\_116\_tef1- $\alpha$*  assay (FAM fluorophore) and  
219 *Rcc\_139\_rpb2* assay (HEX fluorophore) at the primer and probe concentrations described above,  
220 and the *Rcc\_88\_tef1- $\alpha$*  assay (HEX fluorophore) consisting of 0.9  $\mu$ M of each forward and reverse  
221 primer and 0.25  $\mu$ M of probe.

222 Thermal cycling conditions consisted of 95 °C for 10 min followed by 50 cycles of 94 °C for 30  
223 s and 60 °C for 60 s, with a final denaturation at 98 °C for 10 min, followed by a hold step at 4 °C.  
224 The ramp rate between temperatures was 2 °C s<sup>-1</sup>. Results were retrieved from the QX Manager  
225 Standard Edition software v. 1.2 (Bio-Rad). The DNA controls and standards described above  
226 were assessed in duplicate with each uniplex, duplex and triplex assay. The serial dilutions of *R.*  
227 *collo-cygni* DNA were also assessed in triplicate for the triplex assay and a trend line was fitted in  
228 Microsoft Excel 2016. For the triplex assay, intra- and inter-assay variation were reported as the  
229 mean copy number  $\mu$ L<sup>-1</sup> and coefficient of variation of replicate samples of a mixed *R. collo-cygni*  
230 and *H. vulgare* DNA template.

231 To be considered positive, positions of droplets had to align with droplets of standard DNA  
232 samples. For low copy numbers, a minimum requirement for positive detection was for droplets  
233 with each single DNA target to be present and to be above the limit of detection. Samples not  
234 meeting these requirements were re-tested. When the *Hv\_116\_tef1- $\alpha$*  assay or the *Rcc\_139\_rpb2*  
235 and *Rcc\_88\_tef1- $\alpha$*  assays reported more than 10 000 or 5000 copies  $\mu$ L<sup>-1</sup>, respectively, a ten-fold  
236 dilution of the DNA template was assessed.

237

## 238 **Suspected *Ramularia* leaf spot affected leaves**

239 Barley leaves exhibiting symptoms resembling *Ramularia* leaf spot were collected from New  
240 South Wales, South Australia, Tasmania, Victoria, and Western Australia (Table 2). Cultivars  
241 sampled from two locations in Tasmania in 2016 included GrangeR, RGT Planet and Westminster.  
242 Samples of cultivar Baudin were collected from a single field in NSW in 2016. Samples of cultivar  
243 RGT Planet were collected from single fields in South Australia, Tasmania and Victoria in 2020.  
244 Samples of cultivars Oxford and Rosalind were collected from fields in Western Australia in 2018  
245 and 2020, respectively.

246 For each leaf, 5 cm of tissue was removed, cut into pieces and ground with two steel balls at 30  
247 frequency for 2× 60 s (MM400, Retsch). DNA was extracted using the BioSprint 15 protocol  
248 described above. Leaf DNA samples were assessed in qPCR and ddPCR using the triplex assay  
249 designed in this study and in qPCR using the Ram6 assay described by Taylor et al. (2010).  
250 Reaction conditions and standard templates were as described above. When amplification of the  
251 *Hv\_116\_tef1-α* assay failed, a ten-fold dilution of the DNA template was assessed.

252

## 253 **PCR assessment of barley grain samples**

254 Ninety-five barley grain samples (200 g), originating from the southern Western Australian grain  
255 growing region, were provided by DPIRD from seed lots produced in 2019 and 2020. Samples  
256 were supplied based on a suspected association with *Ramularia* leaf spot symptoms in the field.  
257 Four replicate 15 g sub-samples of each grain sample were processed separately in a blender  
258 (Breville, Australia) to produce a fine powder. One gram of ground material from each replicate  
259 was removed and mixed together. DNA was extracted from each 4 g sample using a modified  
260 CTAB DNA extraction method described by Beccari et al. (2019). DNA concentrations were

261 determined as described above and samples were assessed in PCR at the extracted concentration  
262 or as a ten-fold dilution if detection the *Hv\_116\_tef1-a* assay failed. Grain DNA samples were  
263 assessed in qPCR and ddPCR using the triplex assay designed in this study and in qPCR using the  
264 Ram6 assay described by Taylor et al. (2010). Reaction conditions and standard templates were as  
265 described above.

266

## 267 **Results**

### 268 **Characteristics of published *R. collo-cygni* quantitative PCR assays**

269 A BLAST search of the RamF6 and RamR6 primers and Ram6 molecular beacon (Taylor et al.  
270 2010) based on ITS region sequences indicated 100% sequence identity with *R. collo-cygni*.  
271 Individual primer and probe sequences also shared 100% sequence identity with a range of other  
272 *Ramularia* and fungal species. In particular, each primer and probe sequence was 100% identical  
273 to *R. grevilleana* and *R. pusilla*. Nine other *Ramularia* species were identified with highly similar  
274 sequence identities (Supp. Fig. S1). Similar assessment of the RCCj1F, RCCj3R and RCCSON  
275 primers and probe (Matusinsky et al. 2011) indicated 100% shared sequence identity with 16  
276 *Ramularia* species (Supp. Fig. S2). No further assessment of this assay was performed.

277 Using the Ram6 assay *R. collo-cygni* DNA was quantifiable from 0.001 to 10 ng. The standard  
278 curve of the quantification cycle and log of standard DNA quantities was calculated for the Ram6  
279 assay ( $R^2 > 0.99$ ,  $y = -3.9x + 20.3$ ,  $E = 80.6$ ). PCR assessment of the 2 ng  $\mu\text{L}^{-1}$  DNA of the fungal  
280 collection indicated positive detection of *R. collo-cygni* (Cq = 15.6), *R. endophylla* (Cq = 15.8)  
281 and *R. pusilla* (Cq = 22.6). Fluorescence was detected for DNA of the remaining fungal isolates  
282 between 34 and 37 cycles. A cut-off point was set at 35 cycles.

283

## 284 **Characteristics of alternative *R. collo-cygni* and *H. vulgare* quantitative PCR assays**

285 Sequences unique to *R. collo-cygni* were identified from multiple species sequence alignments of  
286 the *rpb2* and *tefl-α* genes, and informed the primer and probe positions for assays *Rcc\_139\_rpb2*  
287 and *Rcc\_88\_tefl-α* (Fig. 1). A BLAST search for each primer and probe indicated 100% sequence  
288 identity with *R. collo-cygni*. No primers or probes were 100% similar to any other fungal or plant  
289 species in the Standard databases: Nucleotide Collection (nr/nt) in GenBank (Supp. Figs. S3 and  
290 S4).

291 A BLAST search for the primers and probe designed for the *Hv\_116\_tefl-α* assay (Fig. 1)  
292 indicated 100% similarity with *H. vulgare* and a range of other plant species. Neither primer was  
293 100% similar to any fungal species, while the probe was 100% similar to species of five fungal  
294 genera.

295 Quantification and standard curve characteristics were similar for duplex (data not shown) and  
296 triplex reactions. In triplex, *R. collo-cygni* DNA was quantifiable from 0.001 to 10 ng. The standard  
297 curve of the quantification cycle and log of standard DNA quantities was calculated for  
298 *Rcc\_139\_rpb2* ( $R^2 > 0.99$ ,  $y = -3.5x + 24.2$ ,  $E = 94$ ) and *Rcc\_88\_tefl-α* ( $R^2 = 0.99$ ,  $y = -3.4x +$   
299  $24.4$ ,  $E = 97$ ) (Fig. 2 and Supp. Table S3).

300 The respective mean values ( $n = 20$ ) and coefficient of variation (CV) of a mixed DNA sample  
301 assessed for intra-assay variability were 50 pg *R. collo-cygni* DNA (CV = 8.1%) for  
302 *Rcc\_139\_rpb2*, 40 pg *R. collo-cygni* DNA (CV = 7.9%) for *Rcc\_88\_tefl-α* and 1320 pg *H. vulgare*  
303 DNA (CV = 8.5%) for *Hv\_116\_tefl-α*. The respective mean values ( $n = 9$ ) and CV of the mixed  
304 DNA sample assessed for inter-assay variability were 70 pg *R. collo-cygni* DNA (CV = 59.0%)

305 for *Rcc\_139\_rpb2*, 63 pg *R. collo-cygni* DNA (CV = 61.0%) for *Rcc\_88\_tef1- $\alpha$*  and 1080 pg *H.*  
306 *vulgare* DNA (CV = 43.0%) for *Hv\_116\_tef1- $\alpha$* .

307 PCR assessment of the DNA of the fungal collection indicated positive detection of only *R.*  
308 *collo-cygni* DNA after 40 cycles in the *Rcc\_139\_rpb2* and *Hv\_116\_tef1- $\alpha$*  duplex. In the  
309 *Rcc\_88\_tef1- $\alpha$*  and *Hv\_116\_tef1- $\alpha$*  duplex only *R. collo-cygni* DNA was detected prior to cycle  
310 38. Low levels of fluorescence were observed after cycle 38 for some samples, but were not  
311 consistent between replicates. In the triplex assay only *R. collo-cygni* DNA was detected prior to  
312 cycle 38, with late fluorescence inconsistently detected among some samples for both *R. collo-*  
313 *cygni* assays. The *Hv\_116\_tef1- $\alpha$*  assay in each duplex or triplex only detected *H. vulgare* DNA  
314 (cv. Baudin).

315 Based on these results a cut-off point, defined as the cycle number above which any sample  
316 response value (quantification cycle) was considered a false positive due to non-specific  
317 fluorescence, was set at 35 cycles. Any fluorescence detection after cycle 35 (outside of the  
318 detected standard DNA sample concentrations) was not considered a positive detection of *R. collo-*  
319 *cygni* DNA. Positive detection also required fluorescence to be reported for both the  
320 *Rcc\_139\_rpb2* and *Rcc\_88\_tef1- $\alpha$*  assays.

321

### 322 **Droplet digital PCR of alternative *R. collo-cygni* and *H. vulgare* assays**

323 Amplitude-based multiplexing allowed clear separation of the individual and combined products  
324 of the *Rcc\_139\_rpb2* and *Rcc\_88\_tef1- $\alpha$*  assays, and the *Hv\_116\_tef1- $\alpha$*  assay (Fig. 3). In triplex  
325 ddPCR, *R. collo-cygni* DNA was detectable from 0.001 to 10 ng (1 to 10 000 copies  $\mu\text{L}^{-1}$ ,  
326 respectively). Uniplex and duplex assays performed similarly (data not shown). The respective  
327 mean values ( $n = 20$ ) and coefficient of variation (CV) of a single mixed DNA sample assessed

328 for intra-assay variability were 134 copies  $\mu\text{L}^{-1}$  (CV = 3.5%) for *Rcc\_139\_rpb2*, 135 copies  $\mu\text{L}^{-1}$   
329 (CV = 2.9%) for *Rcc\_88\_tef1-a* and 85 copies  $\mu\text{L}^{-1}$  (CV = 4.1%) for *Hv\_116\_tef1-a*. The  
330 respective mean values ( $n = 10$ ) and CV of a single mixed DNA sample assessed for inter-assay  
331 variability were 105 copies  $\mu\text{L}^{-1}$  (CV = 12.1%) for *Rcc\_139\_rpb2*, 112 copies  $\mu\text{L}^{-1}$  (CV = 11.0%)  
332 for *Rcc\_88\_tef1-a* and 69 copies  $\mu\text{L}^{-1}$  (CV = 12.5%) for *Hv\_116\_tef1-a*. Copy numbers for the  
333 *Rcc\_139\_rpb2* and *Rcc\_88\_tef1-a* assays were consistently close to a 1:1 ratio in reactions with  
334 less than 10 000 or 5000 copies  $\mu\text{L}^{-1}$  reported by the *Hv\_116\_tef1-a* assay or the *Rcc\_139\_rpb2*  
335 and *Rcc\_88\_tef1-a* assays, respectively.

336 Rain (droplets emitting fluorescence between the negative and positive clusters) was observed  
337 more frequently at higher copy numbers, predominantly for the *Hv\_116\_tef1-a* assay. PCR of the  
338 2 ng  $\mu\text{L}^{-1}$  DNA of the fungal collection reported variable values up to 0.6 copies  $\mu\text{L}^{-1}$ . Detection  
339 was inconsistent across replicates for both *R. collo-cygni* assays.

340 Based on this information a cut-off point, defined as the copy number below which any sample  
341 value was considered a false positive, was set at 1 copy  $\mu\text{L}^{-1}$ . Positive detection also required  
342 fluorescence across both the *Rcc\_139\_rpb2* and *Rcc\_88\_tef1-a* assays.

343

#### 344 **Detection of *R. collo-cygni* DNA in leaf samples**

345 *R. collo-cygni* DNA was detected in leaves from New South Wales, South Australia, Tasmania,  
346 Victoria and Western Australia (Tables 2 and 3). The incidence of detection was 100% in South  
347 Australia, Tasmania, and Victoria from samples collected in 2020. In Western Australia one leaf  
348 sample from 2020 was positive for *R. collo-cygni* DNA and no leaves from 2018 had detectable  
349 *R. collo-cygni* DNA. Samples collected in 2016 from two locations in Tasmania had incidences of  
350 detection of 60 to and 100%, while one leaf sample from New South Wales was positive for *R.*



351 *collo-cygni* DNA. Triplex qPCR and ddPCR assays reported similar positive detections. In  
352 comparison, when the incidence of detection was less than 100%, the Ram6 assay consistently had  
353 greater incidence of detection values than the triplex assay (Table 2).

354 Leaf samples varied in age and condition, with completely senesced samples appearing to inhibit  
355 PCR reactions. For samples where the *Hv\_116\_tef1-α* assay failed to amplify barley DNA, a ten-  
356 fold dilution of the template enabled the detection of barley DNA, and the potential detection of  
357 *R. collo-cygni* DNA (Supp. Tables S4 and S5).

358

### 359 **Detection of *R. collo-cygni* DNA in seed samples**

360 *R. collo-cygni* DNA was not detected in the 95 seed DNA samples using the triplex assay in qPCR  
361 and ddPCR (Table 4 and Supp. Tables S6 and S7). Barley DNA was detected for each sample at  
362 greater than 1 copy  $\mu\text{L}^{-1}$ .

363 Quantitative PCR with the Ram6 assay reported an incidence of detection of 91% for the 22  
364 DNA samples extracted from seed collected in 2019 (Table 4). No detection was reported for the  
365 73 seed samples from 2020.

366

## 367 **Discussion**

368 Specific detection of pathogens is critical for reporting new incursions and pathogen distribution,  
369 and for informing appropriate disease control measures. Methods for detection should be supported  
370 by the latest taxonomic information and critically assessed across different regions and  
371 environments. Previously reported *R. collo-cygni*-specific PCR assays (Matusinsky et al. 2011;

372 Taylor et al. 2010) have been demonstrated to detect other DNA targets, including other *Ramularia*  
373 species, and may report false positive detections. To improve confidence in *R. collo-cygni*  
374 detection, a triplex assay was designed to simultaneously detect two *R. collo-cygni*-specific DNA  
375 sequences, along with barley DNA as a positive control in plant samples. This assay has been used  
376 to confirm the presence of *R. collo-cygni* DNA in barley tissues using both quantitative and droplet  
377 digital PCR, suggesting widespread distribution of *R. collo-cygni* across the southern barley  
378 growing regions of Australia.

379 Interest in designing alternative *R. collo-cygni*-specific PCR assays was initiated by reports of  
380 *R. collo-cygni* in Australia (Biosecurity Tasmania 2020; GRDC 2021; Oxley et al. 2010; Spencer  
381 et al. 2019). Primary investigations of barley tissues were performed using the Ram6 assay (Taylor  
382 et al. 2010), with positive detection of *R. collo-cygni* across regions with contrasting environments  
383 bringing the assay specificity under scrutiny. The presence of various *Ramularia* species in  
384 Australia (Australia's Virtual Herbarium 2021; Braun et al. 2005; Plant Health Australia 2001),  
385 including the likelihood of undescribed species being present in the environment, suggested a risk  
386 for false positive detection. In the current study, DNA of *R. endophylla* and *R. pusilla* reported  
387 similar Cq values to *R. collo-cygni* DNA, with ITS region sequence alignments suggesting  
388 theoretical detection of several other *Ramularia* species. Potential false positive results due to *R.*  
389 *pusilla* detection are a risk, as this fungus has been described on several grass species in Australia,  
390 including *Lolium rigidum* (ryegrass) (Braun et al. 2005) which is a widespread weed in cereal  
391 fields (Lazarides et al. 1997). The greater frequency of detection for the Ram6 assay in leaf DNA  
392 and particularly in DNA from seed collected in 2019 indicates that false positive detection was  
393 occurring for field samples. More comprehensive sequencing and taxonomic assessment of the  
394 *Ramularia* genus has been performed since the first *R. collo-cygni*-specific qPCR assays were

395 described (Videira et al. 2016), providing a resource to enable improved *R. collo-cygni*-specific  
396 PCR assays to be designed. Videira et al. (2016) reported that the ITS region sequence provided  
397 poor resolution within the *Ramularia* genus, while the actin (*actA*), glyceraldehyde 3-phosphate  
398 dehydrogenase (*gapdh*), *rpb2* and *tefl-α* genes provided a larger barcode gap and less overlap  
399 between intra- and inter-specific distances. Thus, the *rpb2* and *tefl-α* genes were selected for the  
400 design of *R. collo-cygni*-specific PCR assays.

401 The manual alignment of primers and probes to species-specific regions in the *rpb2* and *tefl-α*  
402 gene sequences and inclusion of a host DNA target followed previously reported methods for  
403 designing species-specific PCR assays (Knight et al. 2012; Knight and Pethybridge 2020; Knight  
404 et al. 2020; Leisova et al. 2006; Winton et al. 2002). Triplex PCR was attempted in the current  
405 study to enable confirmation of the presence of *R. collo-cygni* using two DNA regions, reducing  
406 the chance of a false positive detection. This is particularly relevant when reporting on a potentially  
407 new pathogen incursion. The inclusion of a barley DNA target as an internal positive control added  
408 further confidence to the detection system, reducing the possibility of false negatives. This benefit  
409 was demonstrated for a selection of *R. collo-cygni* positive leaf DNA samples, where no qPCR  
410 detection was initially reported for either the Ram6 or triplex assay. The lack of barley DNA  
411 amplification in the triplex assay suggested an inhibitor may have affected the PCR, potentially  
412 originating from senesced leaf tissue. While the triplex assay provides robust detection, the use of  
413 each assay in uniplex or duplex may also be appropriate for different research objectives.

414 Development of detection methods across qPCR and ddPCR platforms demonstrated the utility  
415 of each technology for sensitive DNA target detection. While each method relies on similar  
416 reaction chemistries (The dMIQE Group and Huggett 2020), each has benefits and disadvantages.  
417 Quantitative PCR platforms are accessible to a greater number of laboratories compared to ddPCR,

418 require less expensive consumables and can be completed in less time. In comparison, ddPCR does  
419 not require a standard curve (although interpretation of results may be informed by inclusion of  
420 standards) and reports end-point fluorescence, which may be less ambiguous than late Cq values  
421 reported in qPCR (The dMIQE Group and Huggett 2020). Greater sensitivity in ddPCR for low  
422 copy number targets has been reported for grape and citrus pathogens (Martinez-Diz et al. 2020;  
423 Zhao et al. 2016). In the current study, detection of *R. collo-cygni* in field samples using the triplex  
424 assay was similarly reported using both qPCR and ddPCR platforms. The sensitivity of detection  
425 across both platforms was 1 pg of *R. collo-cygni* DNA, which was based on detection of *R. collo-*  
426 *cygni* DNA dilutions and non-target fungal DNA templates. While ddPCR offers an alternative  
427 platform for detecting PCR products, the similarity in detection and reduced cost and time supports  
428 the continued use of qPCR for *R. collo-cygni* detection.

429 The presence of *R. collo-cygni* DNA in leaves of barley plants grown in New South Wales, South  
430 Australia, Tasmania, Victoria and Western Australia indicates a distribution of *R. collo-cygni*  
431 encompassing the southern barley growing regions of Australia. Initial reports of *R. collo-cygni*  
432 detection in Australia lack detailed information regarding species identification or sampling  
433 methods (Biosecurity Tasmania 2020; GRDC 2021; Oxley et al. 2010; Spencer et al. 2019),  
434 however they are generally supported by the results of the current study. Infrequent detection of  
435 *R. collo-cygni* in leaves from New South Wales and Western Australia and no detection from seed  
436 originating from Western Australia suggest *R. collo-cygni* may have a low population density in  
437 the areas sampled. In contrast, the levels of *R. collo-cygni* DNA detected in leaves from South  
438 Australia, Tasmania and Victoria suggest a greater severity of infection. While this study confirms  
439 the presence of *R. collo-cygni* in Australia, assessment of samples from a small number of fields  
440 limited the ability to describe the incidence and distribution across barley growing regions. The

441 distribution of *R. collo-cygni* in Australia may be affected by environmental conditions, as RLS is  
442 reported to be more severe in cool, wet environments (Dussart et al. 2020; Hoheneder et al. 2021b;  
443 Mařík et al. 2011; McGrann and Brown 2018) compared to drier conditions, however distinct  
444 disease responses to environmental factors require further investigation.

445 A likely pathway for introduction of *R. collo-cygni* into Australia is infested barley seed (Harvey  
446 2002; Havis et al. 2014; Matusinsky et al. 2011), with this means of dispersal potentially playing  
447 a role in further distribution across the country. Assessment of global and regional *R. collo-cygni*  
448 population structure is required to gain an understanding of the pathways for pathogen dispersal  
449 (Dussart et al. 2020). The emergence of *R. collo-cygni* in Australia has revealed a range of research  
450 questions which must be addressed. The impact of RLS on barley crops in the Australian  
451 environment and the potential consequences of climate change at the forefront. These  
452 investigations will rely on accurate diagnosis of *R. collo-cygni* in the environment, with the assays  
453 described here potentially allowing management options to be implemented, such as those in the  
454 UK, where seeds that contain less than  $1 \text{ pg } \mu\text{L}^{-1}$  of *R. collo-cygni* DNA are recommended for  
455 sowing (Oxley et al. 2010). A continued focus on this pathogen and disease will be required in  
456 both a regional and global context to understand the implications of its recent recognition as a  
457 threat to barley production (Dussart et al. 2020).

458

## 459 **Acknowledgements**

460 This research was supported by Curtin University. We thank E. Ferrari (Curtin University) and F.  
461 Tini (University of Perugia) for excellent technical support; and K. Fuhrman (Field Applied  
462 Research Australia), N. Poole (Field Applied Research Australia) and K. Jayasena (Department of  
463 Primary Industries and Regional Development) for supplying leaf and seed samples.

## 464 Literature Cited

- 465 Australia's Virtual Herbarium. 2021. Online resource. <http://avh.ala.org.au/> Accessed: 6th May 2021.
- 466 Beccari, G., Arellano, C., Covarelli, L., Tini, F., Sulyok, M., and Cowger, C. 2019. Effect of wheat infection  
467 timing on Fusarium head blight causal agents and secondary metabolites in grain. *Int. J. Food*  
468 *Microbiol.* 290:214-225.
- 469 Beukes, I., Jensen, T., and Coertze, S. 2016. First report of *Ramularia collo-cygni* infecting barley in South  
470 Africa. *J. Plant Pathol.* 98:376.
- 471 Biosecurity Tasmania. 2020. Ramularia leaf spot of barley. Online resource.  
472 [https://dpiwwe.tas.gov.au/biosecurity-tasmania/plant-biosecurity/pests-and-](https://dpiwwe.tas.gov.au/biosecurity-tasmania/plant-biosecurity/pests-and-diseases/ramularia-leaf-spot)  
473 [diseases/ramularia-leaf-spot](https://dpiwwe.tas.gov.au/biosecurity-tasmania/plant-biosecurity/pests-and-diseases/ramularia-leaf-spot) Accessed: 9th November 2020.
- 474 Braun, U., Cunnington, J., Priest, M. J., Shivas, R. G., and Schubert, K. 2005. An annotated check list of  
475 *Ramularia* species in Australia. *Australas. Plant Pathol.* 34:509-515.
- 476 Covarelli, L., Beccari, G., Prodi, A., Generotti, S., Etruschi, F., Juan, C., Ferrer, E., and Mañes, J. 2015.  
477 *Fusarium* species, chemotype characterisation and trichothecene contamination of durum and  
478 soft wheat in an area of central Italy. *J. Sci. Food Agric.* 95:540-551.
- 479 Dussart, F., Creissen, H. E., and Havis, N. D. 2020. *Ramularia collo-cygni* – An enemy in waiting. In: eLS.John  
480 Wiley & Sons, Ltd: Chichester.
- 481 Fountaine, J., and Fraaije, B. 2009. Development of QoI resistant alleles in populations of *Ramularia collo-*  
482 *cygni*. Page 123 in: The second European Ramularia workshop, Edinburgh, United Kingdom,.
- 483 FRAC. 2015. Succinate Dehydrogenase Inhibitor (SDHI) Working Group. Fungicide Resistance Action  
484 Committee, [www.frac.info](http://www.frac.info).
- 485 Frei, P., Gindro, K., Richter, H., and Schürch, S. 2007. Direct-PCR detection and epidemiology of *Ramularia*  
486 *collo-cygni* associated with barley necrotic leaf spots. *J. Phytopathol.* 155:281-288.

- 487 GRDC. 2021. Ramularia leaf spot in barley fact sheet. Online resource. [https://grdc.com.au/ramularia-](https://grdc.com.au/ramularia-leaf-spot-in-barley)  
488 [leaf-spot-in-barley](https://grdc.com.au/ramularia-leaf-spot-in-barley) Accessed: 14th May 2021.
- 489 Harvey, I. 2002. Epidemiology and control of leaf and awn spot of barley caused by *Ramularia collo-cygni*.  
490 N Z Plant Prot 55:331-335.
- 491 Havis, N., Fountaine, J., Gorniak, K., Paterson, L., and Taylor, J. 2015a. Diagnosis of *Ramularia collo-cygni*  
492 and *Rhynchosporium* spp. in barley. Methods Mol Biol 1302:29-36.
- 493 Havis, N. D., and Brown, J. 2019. Ramularia leaf spot in barley. Online resource.  
494 <https://media.ahdb.org.uk/> Accessed: 14th May 2021.
- 495 Havis, N. D., Brown, J. K. M., Clemente, G., Frei, P., Jedryczka, M., Kaczmarek, J., Kaczmarek, M.,  
496 Matusinsky, P., McGrann, G. R. D., Pereyra, S., Piotrowska, M., Sghyer, H., Tellier, A., and Hess, M.  
497 2015b. *Ramularia collo-cygni*—An emerging pathogen of barley crops. Phytopathology 105:895-  
498 904.
- 499 Havis, N. D., Nyman, M., and Oxley, S. J. P. 2014. Evidence for seed transmission and symptomless growth  
500 of *Ramularia collo-cygni* in barley (*Hordeum vulgare*). Plant Pathol. 63:929-936.
- 501 Havis, N. D., Oxley, S. J. P., Piper, S. R., and Langrell, S. R. H. 2006. Rapid nested PCR-based detection of  
502 *Ramularia collo-cygni* direct from barley. FEMS Microbiol. Lett. 256:217-223.
- 503 Hoheneder, F., Hofer, K., Groth, J., Herz, M., Heß, M., and Hüchelhoven, R. 2021a. Ramularia leaf spot  
504 disease of barley is highly host genotype-dependent and suppressed by continuous drought stress  
505 in the field. Journal of Plant Diseases and Protection.
- 506 Hoheneder, F., Hofer, K., Groth, J., Herz, M., Heß, M., and Hüchelhoven, R. 2021b. Ramularia leaf spot  
507 disease of barley is highly host genotype-dependent and suppressed by continuous drought stress  
508 in the field. J. Plant Dis. Prot. 128:749-767.

- 509 Jones, G. M., Busby, E., Garson, J. A., Grant, P. R., Nastouli, E., Devonshire, A. S., and Whale, A. S. 2016.  
510 Digital PCR dynamic range is approaching that of real-time quantitative PCR. *Biomolecular*  
511 *Detection and Quantification* 10:31-33.
- 512 Kaczmarek, M., Piotrowska, M. J., Fountaine, J. M., Gorniak, K., McGrann, G. R. D., Armstrong, A., Wright,  
513 K. M., Newton, A. C., and Havis, N. D. 2017. Infection strategy of *Ramularia collo-cygni* and  
514 development of ramularia leaf spot on barley and alternative graminaceous hosts. *Plant Pathol.*  
515 66:45-55.
- 516 Klein, D. 2002. Quantification using real-time PCR technology: applications and limitations. *Trends Mol.*  
517 *Med.* 8:257-260.
- 518 Knight, N. L., Koenick, L. B., Sharma, S., and Pethybridge, S. J. 2020. Detection of *Cercospora beticola* and  
519 *Phoma betae* on table beet seed using quantitative PCR. *Phytopathology* 110:943-951.
- 520 Knight, N. L., Martin, A., Sutherland, M. W., and Herde, D. J. 2012. Assessment of infection by *Fusarium*  
521 *pseudograminearum* in wheat seedling tissues using quantitative PCR and a visual discoloration  
522 scale. *Plant Dis.* 96:1661-1669.
- 523 Knight, N. L., and Pethybridge, S. J. 2020. An improved PCR assay for species-specific detection and  
524 quantification of *Cercospora beticola*. *Can. J. Plant Pathol.* 42:72-83.
- 525 Koressaar, T., and Remm, M. 2007. Enhancements and modifications of primer design program Primer3.  
526 *Bioinformatics* 23:1289-1291.
- 527 Lazarides, M., Cowley, K., and Hohnen, P. 1997. *CSIRO Handbook of Australian Weeds*. CSIRO Publishing,  
528 Collingwood, Victoria, Australia.
- 529 Leisova, L., Minarikova, V., Kucera, L., and Ovesna, J. 2006. Quantification of *Pyrenophora teres* in infected  
530 barley leaves using real-time PCR. *J. Microbiol. Methods* 67:446-455.
- 531 Lobo, I. 2008. Basic Local Alignment Search Tool (BLAST). *Nature Education* 1:215.



- 532 Mair, W. J., Deng, W., Mullins, J. G. L., West, S., Wang, P., Besharat, N., Ellwood, S. R., Oliver, R. P., and  
533 Lopez-Ruiz, F. J. 2016. Demethylase inhibitor fungicide resistance in *Pyrenophora teres* f. sp. *teres*  
534 associated with target site modification and inducible overexpression of *Cyp51*. *Front. Microbiol.*  
535 7:1279.
- 536 Mair, W. J., Thomas, G. J., Dodhia, K., Hills, A. L., Jayasena, K. W., Ellwood, S. R., Oliver, R. P., and Lopez-  
537 Ruiz, F. J. 2020. Parallel evolution of multiple mechanisms for demethylase inhibitor fungicide  
538 resistance in the barley pathogen *Pyrenophora teres* f. sp. *maculata*. *Fungal Genet. Biol.*  
539 145:103475.
- 540 Makepeace, J. C., Havis, N. D., Burke, J. I., Oxley, S. J. P., and Brown, J. K. M. 2008. A method of inoculating  
541 barley seedlings with *Ramularia collo-cygni*. *Plant Pathol.* 57:991-999.
- 542 Mařík, P., ŠnejdaR, Z., and Matušinsky, P. 2011. Expression of resistance to *Ramularia* leaf spot in winter  
543 barley cultivars grown in conditions of the Czech Republic. *Czech J. Genet. Plant Breed.* 47:37-40.
- 544 Martinez-Diz, M. D., Andres-Sodupe, M., Berbegal, M., Bujanda, R., Diaz-Losada, E., and Gramaje, D. 2020.  
545 Droplet Digital PCR Technology for Detection of *Ilyonectria liriodendri* from Grapevine  
546 Environmental Samples. *Plant Dis.* 104:1144-1150.
- 547 Matusinsky, P., Leisova-Svobodova, L., Gubis, J., Hudcovicova, M., Klcova, L., Gubisova, M., Marik, P.,  
548 Tvaruzek, L., and Minarikova, V. 2011. Impact of the seed-borne stage of *Ramularia collo-cygni* in  
549 barley seed. *J. Plant Pathol.* 93:679-689.
- 550 Matusinsky, P., Svobodova-Leisova, L., Mariks, P., Tvaruzek, L., Stemberkova, L., Hanusova, M.,  
551 Minarikova, V., Vysohlidova, M., and Spitzer, T. 2010. Frequency of a mutant allele of cytochrome  
552 b conferring resistance to QoI fungicides in the Czech population of *Ramularia collo-cygni*. *Journal*  
553 *of Plant Diseases and Protection* 117:248-252.
- 554 McGrann, G. R. D., and Brown, J. K. M. 2018. The role of reactive oxygen in the development of *Ramularia*  
555 leaf spot disease in barley seedlings. *Ann. Bot.* 121:415-430.

- 556 Oxley, S., Havis, N., Evans, A., Waterhouse, S., and Tonguç, L. 2010. A guide to the recognition and  
557 understanding of *Ramularia* and other leaf spots of barley. Scottish Agricultural College and BASF,  
558 Edinburgh.
- 559 Pereyra, S. A., Viera, J. P., and Havis, N. 2014. Managing *Ramularia* leaf spot of barley in Uruguay. in: APS-  
560 CPS Joint Meeting, Minneapolis, Minnesota. Poster: 297.
- 561 Petruska, J., Goodman, M. F., Boosalis, M. S., Sowers, L. C., Cheong, C., and Tinoco, I. 1988. Comparison  
562 between DNA melting thermodynamics and DNA polymerase fidelity. Proc. Natl. Acad. Sci. U.S.A.  
563 85:6252-6256.
- 564 Pinnschmidt, H. O., and Jørgensen, L. N. 2009. Yield effects of *Ramularia* leaf spot on spring barley. Pages  
565 57-66 in: The 2nd European *Ramularia* Workshop – A new disease and challenge in barley  
566 production, S. Oxley, ed. Association of Applied Biologists, Edinburgh.
- 567 Plant Health Australia. 2001. Australian Plant Pest Database. Online resource. <http://appd.ala.org.au>  
568 Accessed: 2nd June 2020.
- 569 Rehfus, A., Matusinsky, P., Strobel, D., Bryson, R., and Stammler, G. 2019. Mutations in target genes of  
570 succinate dehydrogenase inhibitors and demethylation inhibitors in *Ramularia collo-cygni* in  
571 Europe. Journal of Plant Diseases and Protection 126:447-459.
- 572 Schaad, N. W., and Frederick, R. D. 2002. Real-time PCR and its application for rapid plant disease  
573 diagnostics. Can. J. Plant Pathol. 24:250-258.
- 574 Sghyer, H., and Hess, M. 2019. Culture conditions influence conidial production by the barley pathogen  
575 *Ramularia collo-cygni*. Journal of Plant Diseases and Protection 126:319-327.
- 576 Spencer, M., Havis, N., and Creissen, H. 2019. *Ramularia* detection dates by country. Zenodo.
- 577 Stothard, P. 2000. The sequence manipulation suite: Javascript programs for analyzing and formatting  
578 protein and DNA sequences. BioTechniques 28:1102-1104.

- 579 Sutton, B., and Waller, J. 1988. Taxonomy of *Ophiocladium hordei*, causing leaf lesions on Triticale and  
580 other Gramineae. Trans. Br. Mycol. Soc. 90:55-61.
- 581 Taylor, J. M. G., Paterson, L. J., and Havis, N. D. 2010. A quantitative real-time PCR assay for the detection  
582 of *Ramularia collo-cygni* from barley (*Hordeum vulgare*). Lett. Appl. Microbiol. 50:493-499.
- 583 The dMIQE Group, and Huggett, J. F. 2020. The digital MIQE guidelines update: Minimum information for  
584 publication of quantitative digital PCR experiments for 2020. Clin. Chem. 66:1012-1029.
- 585 Untergasser, A., Cutcutache, I., Koressaar, T., Ye, J., Faircloth, B. C., Remm, M., and Rozen, S. G. 2012.  
586 Primer3--new capabilities and interfaces. Nucleic Acids Res 40:e115.
- 587 Videira, S. I. R., Groenewald, J. Z., Braun, U., Shin, H. D., and Crous, P. W. 2016. All that glitters is not  
588 *Ramularia*. Stud. Mycol. 83:49-163.
- 589 Walters, D. R., Havis, N. D., and Oxley, S. J. P. 2008. *Ramularia collo-cygni*: the biology of an emerging  
590 pathogen of barley. FEMS Microbiology Letters 279:1-7.
- 591 Winton, L. M., Stone, J. K., Watrud, L. S., and Hansen, E. M. 2002. Simultaneous one-tube quantification  
592 of host and pathogen DNA with real-time polymerase chain reaction. Phytopathology 92:112-116.
- 593 Wu, Y. X., and Tiedemann, A. V. 2002. Evidence for oxidative stress involved in physiological leaf spot  
594 formation in winter and spring barley. Phytopathology 92:145-155.
- 595 Zhao, Y., Xia, Q., Yin, Y., and Wang, Z. 2016. Comparison of Droplet Digital PCR and Quantitative PCR Assays  
596 for Quantitative Detection of *Xanthomonas citri* Subsp. *citri*. PLoS ONE 11:e0159004.
- 597 Zhong, Q., Bhattacharya, S., Kotsopoulos, S., Olson, J., Taly, V., Griffiths, A. D., Link, D. R., and Larson, J. W.  
598 2011. Multiplex digital PCR: breaking the one target per color barrier of quantitative PCR. Lab Chip  
599 11:2167-2174.

600

601

602 **Table 1.** Primer/probe sets for detection and quantification of *Ramularia collo-cygni* and *Hordeum*  
 603 *vulgare* DNA.

| Target                | Primer/Probe <sup>a</sup>           | Sequence (5'→3')               | Fragment (bp) <sup>b</sup> |
|-----------------------|-------------------------------------|--------------------------------|----------------------------|
| <i>R. collo-cygni</i> | <i>Rcc_139_rpb2_F</i>               | TGGACCTGTTGGAAGAATACGAT        | 139                        |
|                       | <i>Rcc_139_rpb2_R</i>               | AGCAGGCCTTTTCTTCGTA            |                            |
|                       | <i>Rcc_139_rpb2_P</i> <sup>c</sup>  | TGGGTTGGTGTGCACAAGAACGCTGGACAA |                            |
| <i>R. collo-cygni</i> | <i>Rcc_88_tef1-α_F</i>              | AGCCTAGCTGGCCACATGG            | 88                         |
|                       | <i>Rcc_88_tef1-α_R</i>              | TGGGTGAGGTTGTCAGCATTT          |                            |
|                       | <i>Rcc_88_tef1-α_P</i> <sup>c</sup> | ACATGCCGTCCAAATTTCTCTACCATC    |                            |
| <i>H. vulgare</i>     | <i>Hv_116_tef1-α_F</i>              | CAAGGATGACCCTGCCAAG            | 116                        |
|                       | <i>Hv_116_tef1-α_R</i>              | TGTGTGAGGTGTGGCAGTC            |                            |
|                       | <i>Hv_116_tef1-α_P</i> <sup>c</sup> | CAGGTCATCATCATGAACCACCCTG      |                            |

604

605 <sup>a</sup>Suffix: F = forward primer, R = reverse primer, and P = hydrolysis probes.

606 <sup>b</sup>Base pairs of DNA.

607 <sup>c</sup>Probe *Rcc\_139\_rpb2\_P* was labelled with fluorophore HEX on the 5' terminus, probe *Rcc\_88\_tef1-α\_P* was labelled  
 608 with either fluorophore HEX (triplex droplet digital PCR) or Cy5 (triplex quantitative PCR) on the 5' terminus and  
 609 probe *Hv\_116\_tef1-α\_P* was labelled with fluorophore FAM on the 5' terminus. HEX and FAM labelled probes  
 610 contained an internal ZEN quencher and the quencher Iowa Black RQ on the 3' terminus. The Cy5 labelled probe  
 611 contained an internal TAO quencher and the quencher Iowa Black RQ on the 3' terminus.

612

613 **Table 2.** Detection and quantification of *Ramularia collo-cygni* DNA in barley leaf samples from New South Wales (NSW), South  
 614 Australia (SA), Tasmania (Tas), Victoria (Vic) and Western Australia (WA) using the *R. collo-cygni*-specific triplex and Ram6  
 615 quantitative PCR assays.

| Region                      | State | Year | n <sup>a</sup> | <i>Rcc_139_rpb2</i> <sup>c</sup> |                   | <i>Rcc_88_tef1-a</i> <sup>d</sup> |             | Ram6 <sup>f</sup> |                            |             |               |
|-----------------------------|-------|------|----------------|----------------------------------|-------------------|-----------------------------------|-------------|-------------------|----------------------------|-------------|---------------|
|                             |       |      |                | Incidence (%) <sup>b</sup>       | Cq                | DNA (pg)                          | Cq          | DNA (pg)          | Incidence (%) <sup>e</sup> | Cq          | DNA (pg)      |
| Mulwala                     | NSW   | 2016 | 6              | 17                               | 30.8 <sup>g</sup> | 8                                 | 31.6        | 5                 | 50                         | 31.7 ± 1.92 | 1 ± 0.95      |
| Dairy Plains                | TAS   | 2016 | 9              | 100                              | 27.1 ± 1.01       | 244 ± 112.55                      | 27.4 ± 1.05 | 271 ± 119.87      | 100                        | 23.3 ± 1.06 | 159 ± 68.7    |
| Hagley                      | TAS   | 2016 | 10             | 70                               | 28.7 ± 1.4        | 133 ± 64.44                       | 29.2 ± 1.32 | 121 ± 58.79       | 90                         | 25.7 ± 1.36 | 96 ± 65.03    |
| South Stirling              | WA    | 2018 | 60             | 0                                | — <sup>h</sup>    | —                                 | —           | —                 | 3                          | 31.8 ± 2.47 | 3 ± 2.64      |
| Conmurra                    | SA    | 2020 | 10             | 100                              | 26.6 ± 0.22       | 185 ± 17.21                       | 28 ± 0.62   | 101 ± 11.11       | 100                        | 23.7 ± 0.64 | 75 ± 30.46    |
| Hagley                      | TAS   | 2020 | 10             | 100                              | 21.1 ± 0.77       | 1385 ± 206.6                      | 24.5 ± 0.69 | 1459 ± 249.88     | 100                        | 19.7 ± 0.75 | 1267 ± 619.29 |
| Gnarwarre <sup>i</sup>      | VIC   | 2020 | 10             | 100                              | 22.9 ± 0.06       | 1266 ± 36.92                      | 23.5 ± 0.18 | 1337 ± 47.52      | 100                        | 18.6 ± 0.18 | 1185 ± 111.54 |
| South Stirling <sup>i</sup> | WA    | 2020 | 80             | 1                                | 33.6              | 5                                 | 34.4        | 2                 | 14                         | 33.8        | 1             |

616 <sup>a</sup> Number of leaf samples.

617 <sup>b</sup> Percentage of leaf samples for which both *Rcc\_139\_rpb2* and *Rcc\_88\_tef1-a* were detected prior to a quantification cycle (Cq) of 35.

618 <sup>c</sup> Mean ± standard error of the Cq and the calculated DNA quantity for *Rcc\_139\_rpb2*. Samples with no detection for either *Rcc\_139\_rpb2* or *Rcc\_88\_tef1-a* were  
 619 not included in the calculation.

620 <sup>d</sup> Mean ± standard error of the Cq and the calculated DNA quantity for *Rcc\_88\_tef1-a*. Samples with no detection for either *Rcc\_139\_rpb2* or *Rcc\_88\_tef1-a* were  
 621 not included in the calculation.

622 <sup>e</sup> Percentage of leaf samples for which Ram6 (Taylor et al. 2010) was detected prior to a Cq of 35.

623 <sup>f</sup> Mean ± standard error of the Cq and the calculated DNA quantity for Ram6. Samples with no detection were not included in the calculation.

624 <sup>g</sup> For values with no standard error value, *Rcc\_139\_rpb2* and *Rcc\_88\_tef1-a* or Ram6 were detected in one leaf sample.

625 <sup>h</sup> A dash (—) indicates the absence of a Cq.

626 <sup>i</sup> Samples were diluted ten-fold prior to assessment in triplex quantitative PCR based on initial failure to amplify target DNA of the *Hv\_116\_tef1-a* assay. Values  
 627 represent the ten-fold dilutions.

628

629 **Table 3.** Detection and quantification of *Ramularia collo-cygni* DNA in leaf samples from New South Wales (NSW), South Australia  
 630 (SA), Tasmania (Tas), Victoria (Vic) and Western Australia (WA) using *R. collo-cygni*-specific triplex droplet digital PCR.

| Region                    | State | Year | <i>n</i> <sup>a</sup> | Incidence (%) <sup>b</sup> | <i>Rcc_139_rpb2</i> (copies $\mu\text{L}^{-1}$ ) <sup>c</sup> | <i>Rcc_88_tef1-a</i> (copies $\mu\text{L}^{-1}$ ) <sup>d</sup> |
|---------------------------|-------|------|-----------------------|----------------------------|---------------------------------------------------------------|----------------------------------------------------------------|
| Mulwala                   | NSW   | 2016 | 6                     | 17                         | 1 <sup>e</sup>                                                | 1                                                              |
| Dairy Plains <sup>f</sup> | TAS   | 2016 | 9                     | 89                         | 131 ± 54.9                                                    | 162 ± 59.8                                                     |
| Hagley <sup>f</sup>       | TAS   | 2016 | 10                    | 60                         | 59 ± 26.2                                                     | 74 ± 32.4                                                      |
| South Stirling            | WA    | 2018 | 60                    | 0                          | — <sup>g</sup>                                                | —                                                              |
| Conmurra <sup>f</sup>     | SA    | 2020 | 10                    | 100                        | 29 ± 12.1                                                     | 32 ± 14.5                                                      |
| Hagley <sup>f</sup>       | TAS   | 2020 | 10                    | 100                        | 648 ± 354.9                                                   | 674 ± 371.5                                                    |
| Gnarwarre <sup>f</sup>    | VIC   | 2020 | 10                    | 100                        | 4642 ± 588.3                                                  | 4764 ± 612.3                                                   |
| South Stirling            | WA    | 2020 | 80                    | 1                          | 2.3                                                           | 4.1                                                            |

631 <sup>a</sup> Number of leaf samples.

632 <sup>b</sup> Percentage of leaf samples for which both *Rcc\_139\_rpb2* and *Rcc\_88\_tef1-a* were detected at greater than 1 copy  $\mu\text{L}^{-1}$ .

633 <sup>c</sup> Mean ± standard error of the number of copies per microliter for *Rcc\_139\_rpb2*. Samples with detection of less than 1 copy  $\mu\text{L}^{-1}$  for either *Rcc\_139\_rpb2* or  
 634 *Rcc\_88\_tef1-a* were not included in the calculation.

635 <sup>d</sup> Mean ± standard error of the number of copies per microliter for *Rcc\_88\_tef1-a*. Samples with detection of less than 1 copy  $\mu\text{L}^{-1}$  for either *Rcc\_139\_rpb2* or  
 636 *Rcc\_88\_tef1-a* were not included in the calculation.

637 <sup>e</sup> For values with no standard error value, *Rcc\_139\_rpb2* and *Rcc\_88\_tef1-a* were detected in one leaf sample.

638 <sup>f</sup> Samples were diluted ten-fold prior to assessment in droplet digital PCR. Sample copies per microliter values were multiplied by 10 before calculating the mean  
 639 and standard error.

640 <sup>g</sup> A dash (—) indicates the detection of less than 1 copy  $\mu\text{L}^{-1}$  for *Rcc\_139\_rpb2* and *Rcc\_88\_tef1-a*.

641

642 **Table 4.** Detection and quantification of *Ramularia collo-cygni* DNA in barley seed sample collections from Western Australia (WA)  
 643 using the *R. collo-cygni*-specific triplex and Ram6 quantitative PCR assays.

| Collection | State | Year | <i>n</i> <sup>a</sup> | <i>Rcc_139_rpb2</i> <sup>c</sup> |                |          |    | <i>Rcc_88_tef1-α</i> <sup>d</sup> |                            |    |            | Ram6 <sup>f</sup>          |    |          |
|------------|-------|------|-----------------------|----------------------------------|----------------|----------|----|-----------------------------------|----------------------------|----|------------|----------------------------|----|----------|
|            |       |      |                       | Incidence (%) <sup>b</sup>       | Cq             | DNA (pg) | Cq | DNA (pg)                          | Incidence (%) <sup>e</sup> | Cq | DNA (pg)   | Incidence (%) <sup>e</sup> | Cq | DNA (pg) |
| RSS19_22   | WA    | 2019 | 22                    | 0                                | — <sup>g</sup> | —        | —  | —                                 | —                          | 91 | 32.6 ± 0.6 | 3 ± 0.73                   |    |          |
| RSS20_73   | WA    | 2020 | 73                    | 0                                | —              | —        | —  | —                                 | —                          | 0  | —          | —                          |    |          |

644

645 <sup>a</sup> Number of seed samples.

646 <sup>b</sup> Percentage of seed samples for which both *Rcc\_139\_rpb2* and *Rcc\_88\_tef1-α* were detected prior to a quantification cycle (Cq) of 35.

647 <sup>c</sup> Mean ± standard error of the Cq and the calculated DNA quantity for *Rcc\_139\_rpb2*. Samples with no detection for either *Rcc\_139\_rpb2* or *Rcc\_88\_tef1-α* were  
 648 not included in the calculation.

649 <sup>d</sup> Mean ± standard error of the Cq and the calculated DNA quantity for *Rcc\_88\_tef1-α*. Samples with no detection for either *Rcc\_139\_rpb2* or *Rcc\_88\_tef1-α* were  
 650 not included in the calculation.

651 <sup>e</sup> Percentage of leaf samples for which Ram6 (Taylor et al. 2010) was detected prior to a Cq of 35.

652 <sup>f</sup> Mean ± standard error of the Cq and the calculated DNA quantity for Ram6. Samples with no detection were not included in the calculation.

653 <sup>g</sup> A dash (—) indicates the absence of a Cq.

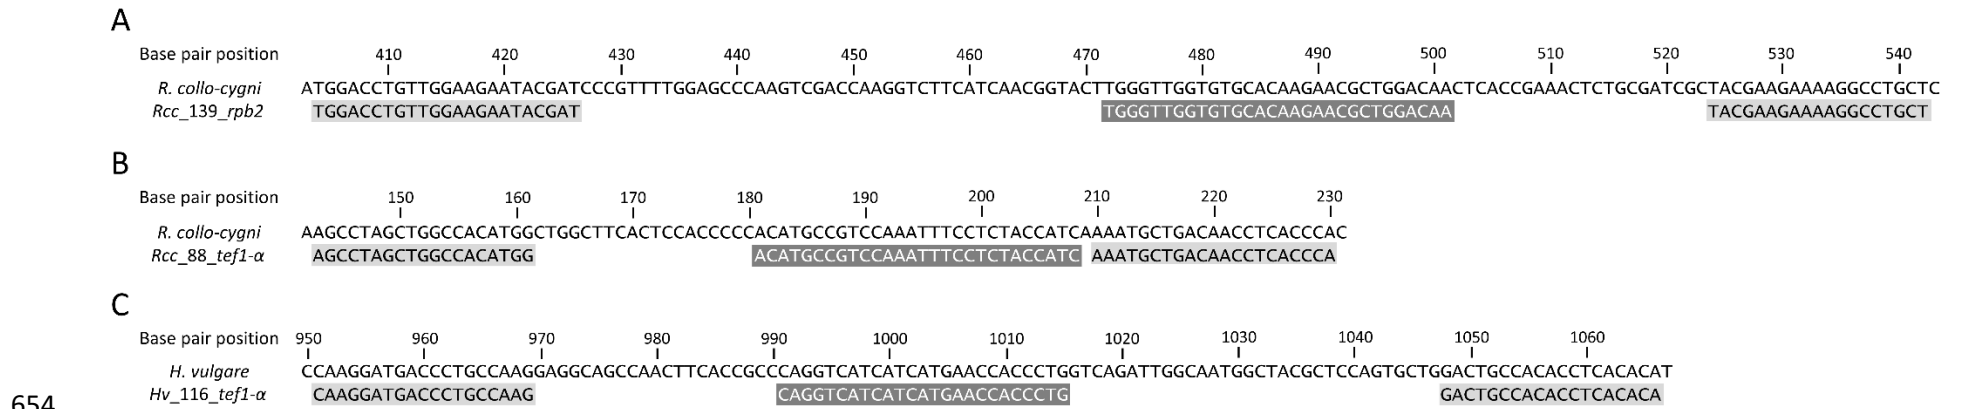

654

655 **Fig. 1.** Alignment of primers (black text on grey) and probes (white text on grey) against the second largest subunit of RNA polymerase  
 656 II (A) and translation elongation factor 1- $\alpha$  (B) gene sequences of *Ramularia collo-cygni*, and the translation elongation factor 1- $\alpha$  gene  
 657 sequence of *Hordeum vulgare*. GenBank accession numbers KX288543 (A), KX287944 (B) and KP293845 (C) were used for base pair  
 658 reference positions.

659



660

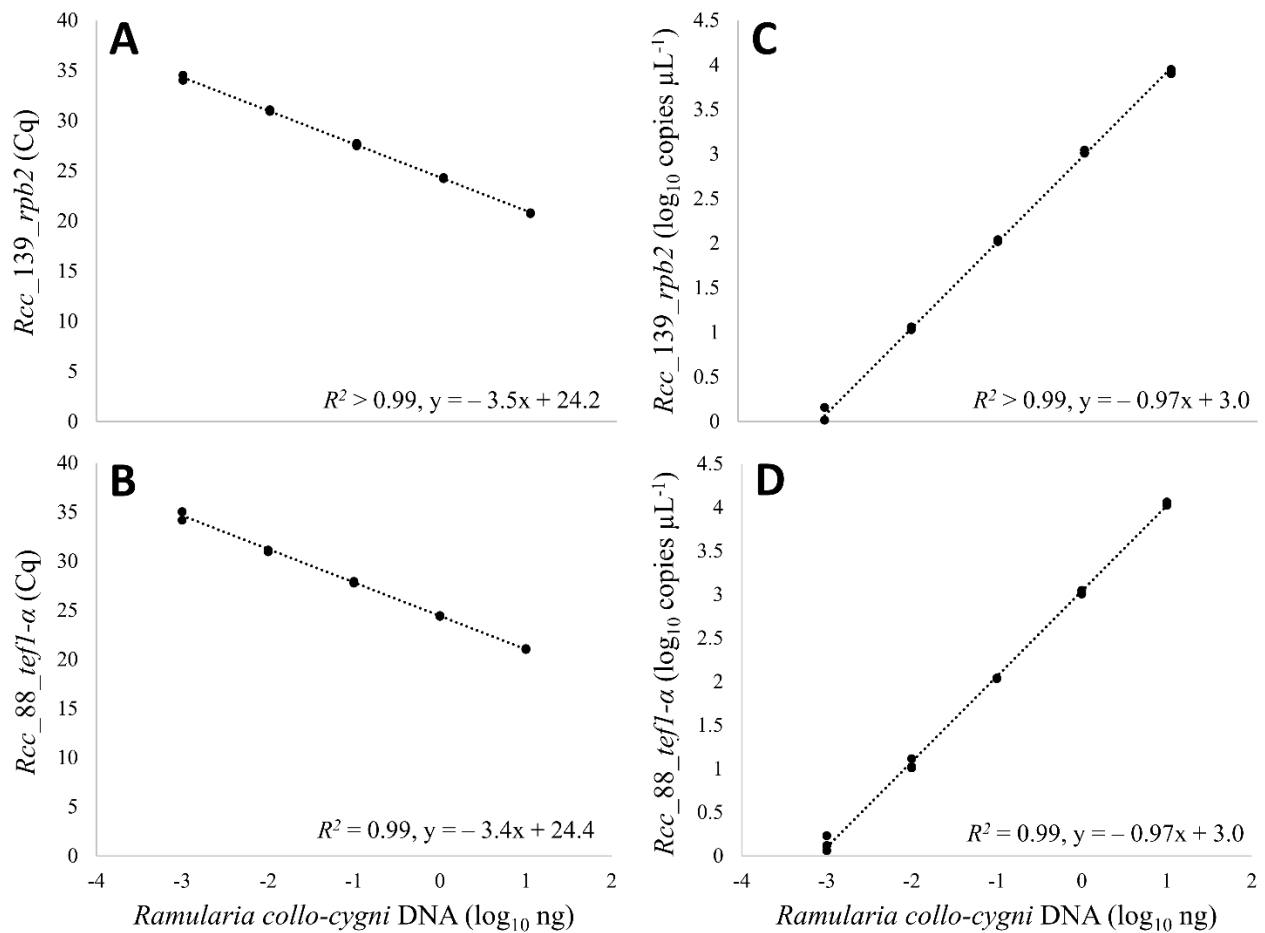

661

662

663 **Fig. 2.** Linear relationship between the quantification cycle (Cq) and the logarithm of the *R. collo-*

664 *cygni* DNA quantity for the *Rcc\_139\_rpb2* assay (A) and *Rcc\_88\_tef1-α* assay (B) in quantitative

665 PCR, and the logarithm of the copies per microliter and the logarithm of the *R. collo-cygni* DNA

666 quantity for the *Rcc\_139\_rpb2* assay (C) and *Rcc\_88\_tef1-α* assay (D) in droplet digital PCR. *R.*

667 *collo-cygni* DNA quantities were a ten-fold serial dilution from 10 to 0.001 ng ( $n = 3$ ). The

668 correlation coefficient ( $R^2$ ) and linear equation ( $y = mx + c$ ) are provided.

669

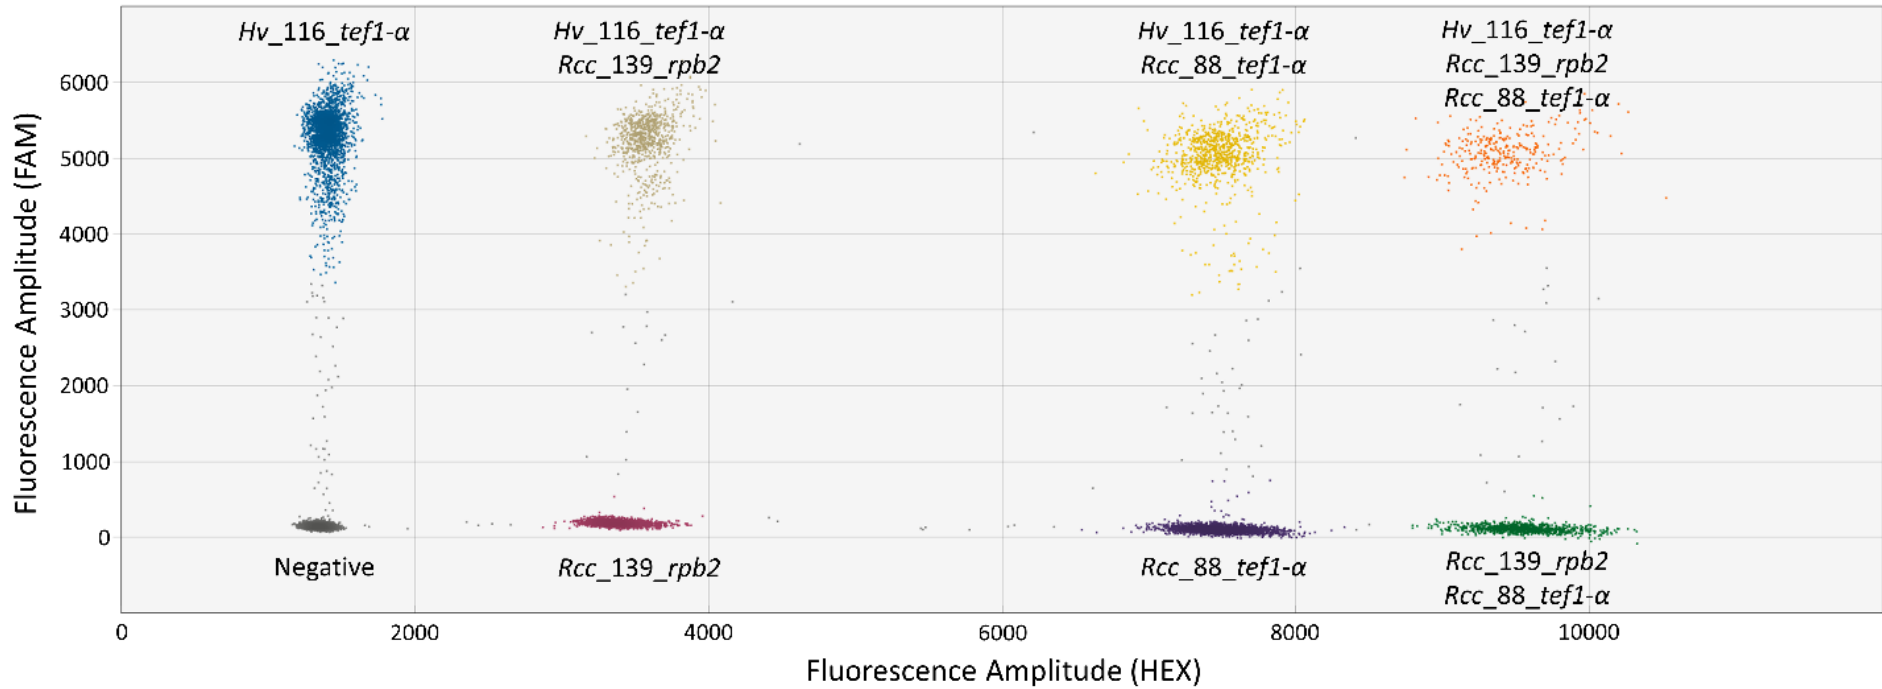

670

671 **Fig. 3.** Representative 2D plot of droplet fluorescence during amplitude-based triplex droplet digital PCR combining the *Hv\_116\_tef1-*  
672 *α* (*Hordeum vulgare*; FAM fluorophore), *Rcc\_139\_rpb2* (*Ramularia collo-cygni*; HEX fluorophore) and *Rcc\_88\_tef1-α* (*R. collo-cygni*;  
673 HEX fluorophore) assays. The sample template was a ten-fold dilution of DNA extracted from a diseased leaf. Eight droplet clusters are  
674 present, indicating the amplification of each DNA target as either single or combined detections within each droplet. The negative cluster  
675 indicates droplets which did not contain DNA targets. Copy numbers per microliter for the *Hv\_116\_tef1-α*, *Rcc\_139\_rpb2* and  
676 *Rcc\_88\_tef1-α* assays were 346, 362 and 375, respectively.

677 **Supplementary Figures**

678

679

| Accession | Base pair position                | 390                                                                                                             | 400 | 410 | 420 | 430 | 440 | 450 | 460            | 470                       | 480            | 490 | 500        | 510            |
|-----------|-----------------------------------|-----------------------------------------------------------------------------------------------------------------|-----|-----|-----|-----|-----|-----|----------------|---------------------------|----------------|-----|------------|----------------|
| NR_154944 | <i>R. collo-cygni</i>             | TCGAGCGTCATTTACCACTCAAGCCTCGCTTGGTATTGGGCGTCGCGAGTCTCTCGCGCGCCTCAAAGTCTCCGGCTGAGCGGTTTCGTCTCCAGCGTTGTGGCAACTATT |     |     |     |     |     |     |                |                           |                |     |            | -CGCAGAGGAGTTC |
| KP894223  | <i>R. grevilleana</i>             | TCGAGCGTCATTTACCACTCAAGCCTCGCTTGGTATTGGGCGTCGCGAGTCTCTCGCGCGCCTCAAAGTCTCCGGCTGAGCGGTTTCGTCTCCAGCGTTGTGGCAACTATT |     |     |     |     |     |     |                |                           |                |     |            | -CGCAGAGGAGTTC |
| NR_154917 | <i>R. pusilla</i>                 | TCGAGCGTCATTTACCACTCAAGCCTCGCTTGGTATTGGGCGTCGCGAGTCTCTCGCGCGCCTCAAAGTCTCCGGCTGAGCGGTTTCGTCTCCAGCGTTGTGGCAACTATT |     |     |     |     |     |     |                |                           |                |     |            | -CGCAGAGGAGTTC |
| NR_145121 | <i>R. eucalypti</i>               | TCGAGCGTCATTTACCACTCAAGCCTCGCTTGGTATTGGGCGTCGCGAGTCTCTCGCGCGCCTCAAAGTCTCCGGCTGAGCGGTTTCGTCTCCAGCGTTGTGGCAACTATT |     |     |     |     |     |     |                |                           |                |     |            | -CGCAGAGGAGTTC |
| NR_154941 | <i>R. citricola</i>               | TCGAGCGTCATTTACCACTCAAGCCTCGCTTGGTATTGGGCGTCGCGAGTCTCTCGCGCGCCTCAAAGTCTCCGGCTGAGCGGTTTCGTCTCCAGCGTTGTGGCAACTATT |     |     |     |     |     |     |                |                           |                |     |            | -CGCAGAGGAGTTC |
| NR_145125 | <i>R. hydrangeae-macrophyllae</i> | TCGAGCGTCATTTACCACTCAAGCCTCGCTTGGTATTGGGCGTCGCGAGTCTCTCGCGCGCCTCAAAGTCTCCGGCTGAGCGGTTTCGTCTCCAGCGTTGTGGCAACTATT |     |     |     |     |     |     |                |                           |                |     |            | -CGCAGAGGAGTTC |
| MH865907  | <i>R. coleospori</i>              | TCGAGCGTCATTTACCACTCAAGCCTCGCTTGGTATTGGGCGTCGCGAGTCTCTCGCGCGCCTCAAAGTCTCCGGCTGAGCGGTTTCGTCTCCAGCGTTGTGGCAACTATT |     |     |     |     |     |     |                |                           |                |     |            | -CGCAGAGGAGTTC |
| MH865235  | <i>R. glennii</i>                 | TCGAGCGTCATTTACCACTCAAGCCTCGCTTGGTATTGGGCGTCGCGAGTCTCTCGCGCGCCTCAAAGTCTCCGGCTGAGCGGTTTCGTCTCCAGCGTTGTGGCAACTATT |     |     |     |     |     |     |                |                           |                |     |            | -CGCAGAGGAGTTC |
| MH854752  | <i>R. weberiana</i>               | TCGAGCGTCATTTACCACTCAAGCCTCGCTTGGTATTGGGCGTCGCGAGTCTCTCGCGCGCCTCAAAGTCTCCGGCTGAGCGGTTTCGTCTCCAGCGTTGTGGCAACTATT |     |     |     |     |     |     |                |                           |                |     |            | -CGCAGAGGAGTTC |
| KF251329  | <i>R. endophylla</i>              | TCGAGCGTCATTTACCACTCAAGCCTCGCTTGGTATTGGGCGTCGCGAGTCTCTCGCGCGCCTCAAAGTCTCCGGCTGAGCGGTTTCGTCTCCAGCGTTGTGGCAACTATT |     |     |     |     |     |     |                |                           |                |     |            | -CGCAGAGGAGTTC |
| 680       | RamF6/Ram6/RamR6                  | CGTCATTTACCACTCAAG                                                                                              |     |     |     |     |     |     | <u>GCGATTC</u> | <u>CCGGCTGAGCGGTTTCGT</u> | <u>CATCGCG</u> |     | GGCAACTATT | -CGCAGAGG      |

681 **Supplementary Figure S1.** Alignment of primers RamF6 and RamR6 and molecular beacon Ram6 (Taylor et al. 2010) against internal  
 682 transcribed spacer region sequences of the target fungus *Ramularia collo-cygni* and nine other *Ramularia* species. The nine *Ramularia*  
 683 species were selected based on similar sequences in the primer and molecular beacon binding regions. *R. collo-cygni* (NR\_154944) was  
 684 used for base pair positions. Bases with grey shading and black text indicate polymorphic sequences. Primers are designated by plain  
 685 text and the molecular beacon is designated by a grey background with white text (*R. collo-cygni* specific loop sequence) and underlined  
 686 bases (complementary stem sequences). A (-) indicates the position of an inserted or deleted base in the aligned sequences.

| Accession |                                   | Base pair position | 400         | 410                                                  | 420                  | 430 | 440               | 450 |
|-----------|-----------------------------------|--------------------|-------------|------------------------------------------------------|----------------------|-----|-------------------|-----|
| NR_154944 | <i>R. collo-cygni</i>             |                    | GAGCGTCATTT | CACCACTCAAGCCTCGCTTGGTATTGGGCGTCGCGAGTCTCTCGCGCGCCTC |                      |     |                   |     |
| MH974744  | <i>R. coleosporii</i>             |                    | GAGCGTCATTT | CACCACTCAAGCCTCGCTTGGTATTGGGCGTCGCGAGTCTCTCGCGCGCCTC |                      |     |                   |     |
| MK290606  | <i>R. cynarae</i>                 |                    | GAGCGTCATTT | CACCACTCAAGCCTCGCTTGGTATTGGGCGTCGCGAGTCTCTCGCGCGCCTC |                      |     |                   |     |
| MH859023  | <i>R. digitalis-ambiguae</i>      |                    | GAGCGTCATTT | CACCACTCAAGCCTCGCTTGGTATTGGGCGTCGCGAGTCTCTCGCGCGCCTC |                      |     |                   |     |
| MH863520  | <i>R. endophylla</i>              |                    | GAGCGTCATTT | CACCACTCAAGCCTCGCTTGGTATTGGGCGTCGCGAGTCTCTCGCGCGCCTC |                      |     |                   |     |
| MH931817  | <i>R. eucalypti</i>               |                    | GAGCGTCATTT | CACCACTCAAGCCTCGCTTGGTATTGGGCGTCGCGAGTCTCTCGCGCGCCTC |                      |     |                   |     |
| MH865235  | <i>R. glennii</i>                 |                    | GAGCGTCATTT | CACCACTCAAGCCTCGCTTGGTATTGGGCGTCGCGAGTCTCTCGCGCGCCTC |                      |     |                   |     |
| MK290607  | <i>R. heraclei</i>                |                    | GAGCGTCATTT | CACCACTCAAGCCTCGCTTGGTATTGGGCGTCGCGAGTCTCTCGCGCGCCTC |                      |     |                   |     |
| MH863184  | <i>R. hydrangeae-macrophyllae</i> |                    | GAGCGTCATTT | CACCACTCAAGCCTCGCTTGGTATTGGGCGTCGCGAGTCTCTCGCGCGCCTC |                      |     |                   |     |
| MH864616  | <i>R. nyssicola</i>               |                    | GAGCGTCATTT | CACCACTCAAGCCTCGCTTGGTATTGGGCGTCGCGAGTCTCTCGCGCGCCTC |                      |     |                   |     |
| MH857463  | <i>R. phacae-frigidae</i>         |                    | GAGCGTCATTT | CACCACTCAAGCCTCGCTTGGTATTGGGCGTCGCGAGTCTCTCGCGCGCCTC |                      |     |                   |     |
| NR_165576 | <i>R. pistaciae</i>               |                    | GAGCGTCATTT | CACCACTCAAGCCTCGCTTGGTATTGGGCGTCGCGAGTCTCTCGCGCGCCTC |                      |     |                   |     |
| MW031250  | <i>R. plurivora</i>               |                    | GAGCGTCATTT | CACCACTCAAGCCTCGCTTGGTATTGGGCGTCGCGAGTCTCTCGCGCGCCTC |                      |     |                   |     |
| MH862890  | <i>R. proteae</i>                 |                    | GAGCGTCATTT | CACCACTCAAGCCTCGCTTGGTATTGGGCGTCGCGAGTCTCTCGCGCGCCTC |                      |     |                   |     |
| MW332206  | <i>R. sphaeroidea</i>             |                    | GAGCGTCATTT | CACCACTCAAGCCTCGCTTGGTATTGGGCGTCGCGAGTCTCTCGCGCGCCTC |                      |     |                   |     |
| MH865856  | <i>R. stellenboschensis</i>       |                    | GAGCGTCATTT | CACCACTCAAGCCTCGCTTGGTATTGGGCGTCGCGAGTCTCTCGCGCGCCTC |                      |     |                   |     |
| MH854752  | <i>R. weberiana</i>               |                    | GAGCGTCATTT | CACCACTCAAGCCTCGCTTGGTATTGGGCGTCGCGAGTCTCTCGCGCGCCTC |                      |     |                   |     |
| 687       | RCCj1F/RCCSON/RCCj3R              |                    | GAGCGTCATTT | CACCACTCAAG                                          | CTCGCTTGGTATTGGGCGTC |     | AGTCTCTCGCGCGCCTC |     |

688 **Supplementary Figure S2.** Alignment of primers RCCj1F and RCCj3R and probe RCCSON (Matusinsky et al. 2011) against internal  
689 transcribed spacer region sequences of the target fungus *Ramularia collo-cygni* and 16 other *Ramularia* species. The 16 *Ramularia*  
690 species were selected based on identical sequences in the primer and probe binding regions. *R. collo-cygni* (NR\_154944) was used for  
691 base pair positions. Primers are designated by plain text and the probe is designated by a grey background with white text.

692

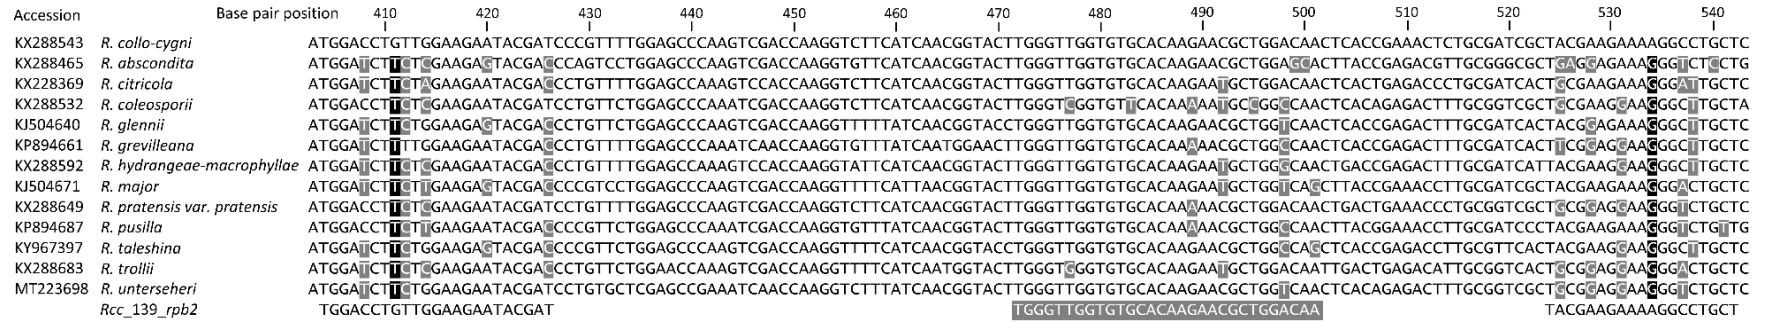

693

694 **Supplementary Figure S3.** Alignment of the *Rcc\_139\_rpb2* assay primers and probe against RNA polymerase II second largest subunit  
695 (*rpb2*) sequences of the target fungus *Ramularia collo-cygni* and 12 other *Ramularia* species. The 12 *Ramularia* species were selected  
696 based on similar sequences in the primer and probe binding regions. *R. collo-cygni* (KX288543) was used for base pair positions.  
697 Polymorphisms between *R. collo-cygni* and the remaining species sequences are indicated by shading (white text on black indicates a  
698 unique *R. collo-cygni* polymorphism and white text on grey indicates a partially discriminating polymorphism). Primers are designated  
699 by plain text and the probe is designated by a grey background with white text.

700

701

702

| Accession |                                   | Base pair position | 150                           | 160                                          | 170                                                                  | 180                            | 190                              | 200   | 210      | 220                   | 230 |
|-----------|-----------------------------------|--------------------|-------------------------------|----------------------------------------------|----------------------------------------------------------------------|--------------------------------|----------------------------------|-------|----------|-----------------------|-----|
| KX287944  | <i>R. collo-cygni</i>             |                    | AAGCCTAGCTGGCCACATGGCTGGCTTAC | -TCCACCCC                                    | --CACATGCCGTCCAAATTTCT                                               | -----                          | CTACCATCAAATGCTGACAACCTCACCCAC   |       |          |                       |     |
| KP894440  | <i>R. grevilleana</i>             |                    | CTGCCTAGCT-----CA             | -----TTCACTTT                                | -GCCCTCCACATGCCGATCAATATATCTTAT                                      | -----                          | CGA-----ACAATGCTAACGACITTAATCCAC |       |          |                       |     |
| KP894466  | <i>R. pusilla</i>                 |                    | ATGCCTCGCTCG-CACAACA          | CCGGCTTCACTTC                                | -GCTCCTCCATATGCCGCGAGGATATCT                                         | -----                          | CCACCAACACAATGCTGACAACCTCACCCCT  |       |          |                       |     |
| KJ504707  | <i>R. eucalypti</i>               |                    | ATGCCTCGCTGGCCACAACA          | TCAGCAGCGCTTC                                | -ACTTCTTACAAGACGCTTCCAATGTCCCT                                       | -----                          | GAAA--AAACAATGCTGACGACCTCACCCAT  |       |          |                       |     |
| KX228373  | <i>R. citricola</i>               |                    | ATGCCTCGCTGGCCACAACA          | CCAGCAGCACATGAACTCCTCCACATGCCGACAAATATCT     | -----                                                                | CGACA--ACAATGCTAACGCCCTCACCCAC |                                  |       |          |                       |     |
| KX287994  | <i>R. hydrangeae-macrophyllae</i> |                    | ATGCCTCGCTGGCCACAACA          | TCAGCAGCACATGATCTCCTCCACATGCCGACAAATATCT     | -----                                                                | CGACA--ACAATGCTAACGCCCTCACCCAC |                                  |       |          |                       |     |
| KX287933  | <i>R. coleosporii</i>             |                    | ATGCCTCGCTGGCCACAACA          | CCGGCACCA-ATCCACCCGT                         | -CGCACCCGCTTACAAGTCTCT                                               | -----                          | GAAA--TCACTACTACAATGTCAACCCAC    |       |          |                       |     |
| KJ504684  | <i>R. glennii</i>                 |                    | ATGCCTCGCTGTCCCAAC            | -----CTTC                                    | ---CAACCTCT-CACAGCCGTACAAATGCAT                                      | -C-----                        | ACAAAAACAATGCTGACGACCTCACCCAT    |       |          |                       |     |
| KP894465  | <i>R. endophylla</i>              |                    | AAGCCTCGCTGGCCACAACA          | CTGGCAACCCCT                                 | ---CATCTCCAGTACCGCATCGACTTCACTCATAAATCGAAATGATCAATGCTGACGACCTCACCCAC |                                |                                  |       |          |                       |     |
| KX287970  | <i>R. euonymicola</i>             |                    | ATGCCTAGCTGGCCACAACA          | TCAGGATAACTT                                 | -----ATGTTGGCCGATTAATGCT                                             | -A-----                        | GAAC--ACAATGCTGACAATATCTCCAC     |       |          |                       |     |
| KJ504715  | <i>R. major</i>                   |                    | ATGCCTCGCTGGCCACAACA          | TCAGAAGCA-ATCCACCTATCCACAAGCCGTTCCGTATTTG    | -----                                                                | CGACA--ACAATGCTGACAACCTCACCCAT |                                  |       |          |                       |     |
| KX288083  | <i>R. trollii</i>                 |                    | ATGTTCTCGCTGGCTTCAGCA         | CCAGCGTCGCTTTTGCTCCTCCACATGCCGTGCAAAAT-TCACT | -----                                                                | CGACA--ACAATGCTGACGACCTCA-CCAT |                                  |       |          |                       |     |
| 703       | <i>Rcc_88_tef1-α</i>              |                    | AGCCTAGCTGGCCACATGG           |                                              |                                                                      |                                | ACATGCCGTCCAAATTTCT              | ----- | CTACCATC | AAATGCTGACAACCTCACCCA |     |

704 **Supplementary Figure S4.** Alignment of the *Rcc\_88\_tef1-α* assay primers and probe against translation elongation factor 1- $\alpha$  (*tef1-α*)  
705 sequences of the target fungus *Ramularia collo-cygni* and 11 other *Ramularia* species. The 11 *Ramularia* species were selected based  
706 on similar sequences in the primer and probe binding regions. *R. collo-cygni* (KX287944) was used for base pair positions.  
707 Polymorphisms between *R. collo-cygni* and the remaining species sequences are indicated by shading (white text on black indicates a  
708 unique *R. collo-cygni* polymorphism and white text on grey indicates a partially discriminating polymorphism). Primers are designated  
709 by plain text and the probe is designated by a grey background with white text. A (-) indicates the position of an inserted or deleted base  
710 in the aligned sequences.
